# Supplementary material for: Transcriptional profiling unveils molecular subgroups of adaptive and maladaptive right ventricular remodeling in pulmonary hypertension
Source: PubMed Central journal article supplement (PMC11358157; doi:10.1038/s44161-023-00338-3), 2023-09-28
Supplement: 44161_2023_338_MOESM13_ESM.pdf [file 44161_2023_338_MOESM13_ESM.pdf]

## Uncropped scan of Gel 1: Extended data 4b

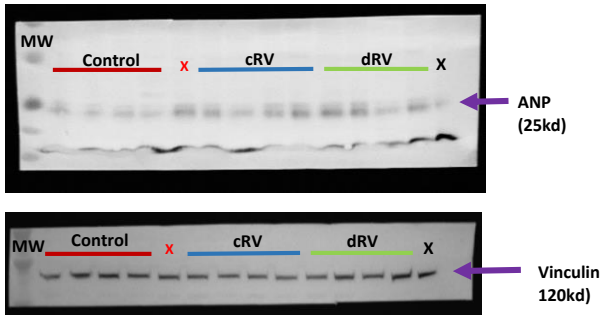

X = removed from the compensated group due to low RVEDP  
X = removed from the decompensated group due to low ANP

## Uncropped scan of Gel 2: Extended data 4b

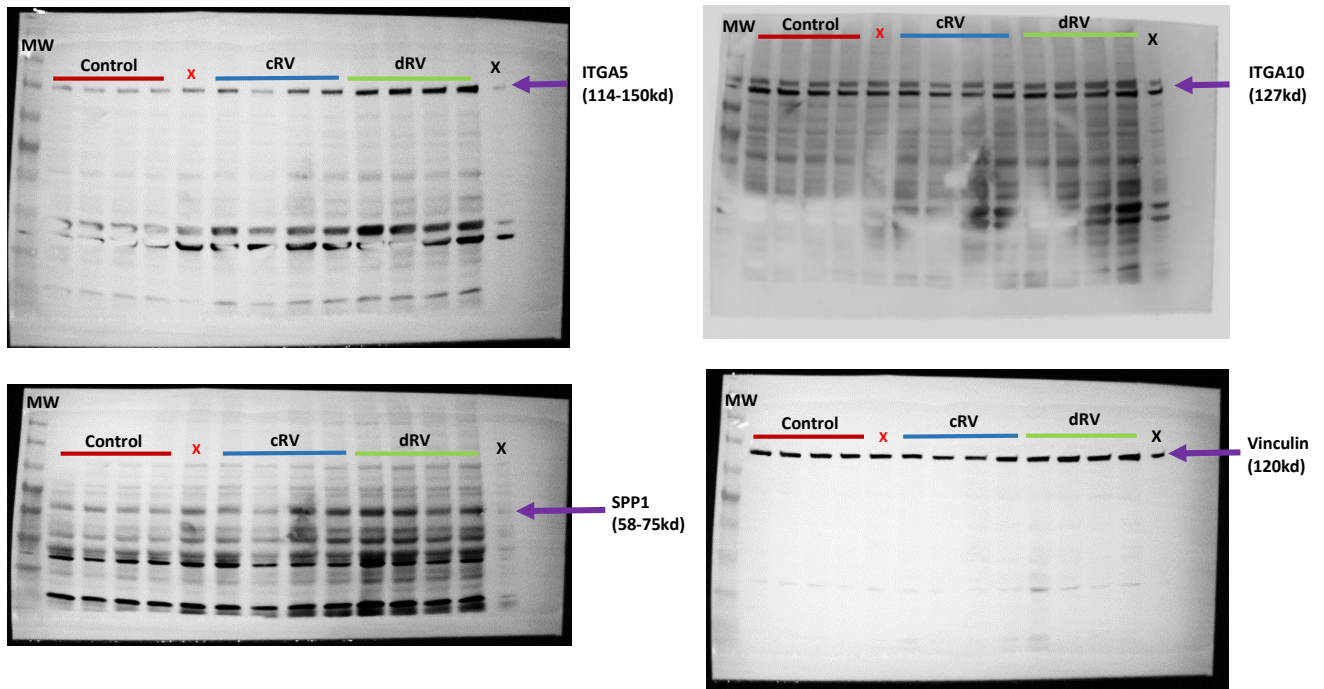

X = removed from the compensated group due to low RVEDP  
X = removed from the decompensated group due to low ANP
